# Supplementary material for: Emerging global freshwater challenges unveiled through observation-constrained projections
Source: Copernicus journal article supplement (doi:10.5194/egusphere-2025-4720), 2025-10-06
Supplement: Supplementary file 1 [file egusphere-2025-4720-supplement.pdf]

Supporting Information for

**Emerging global freshwater challenges unveiled through observation-constrained projections**

Fei Huo<sup>1</sup>, Yanping Li<sup>1</sup>, Zhenhua Li<sup>1</sup>

<sup>1</sup> Department of Physics and Astronomy, Western University, London, Canada

**Contents of this file**

Figures S1 to S7  
Tables S1 to S2

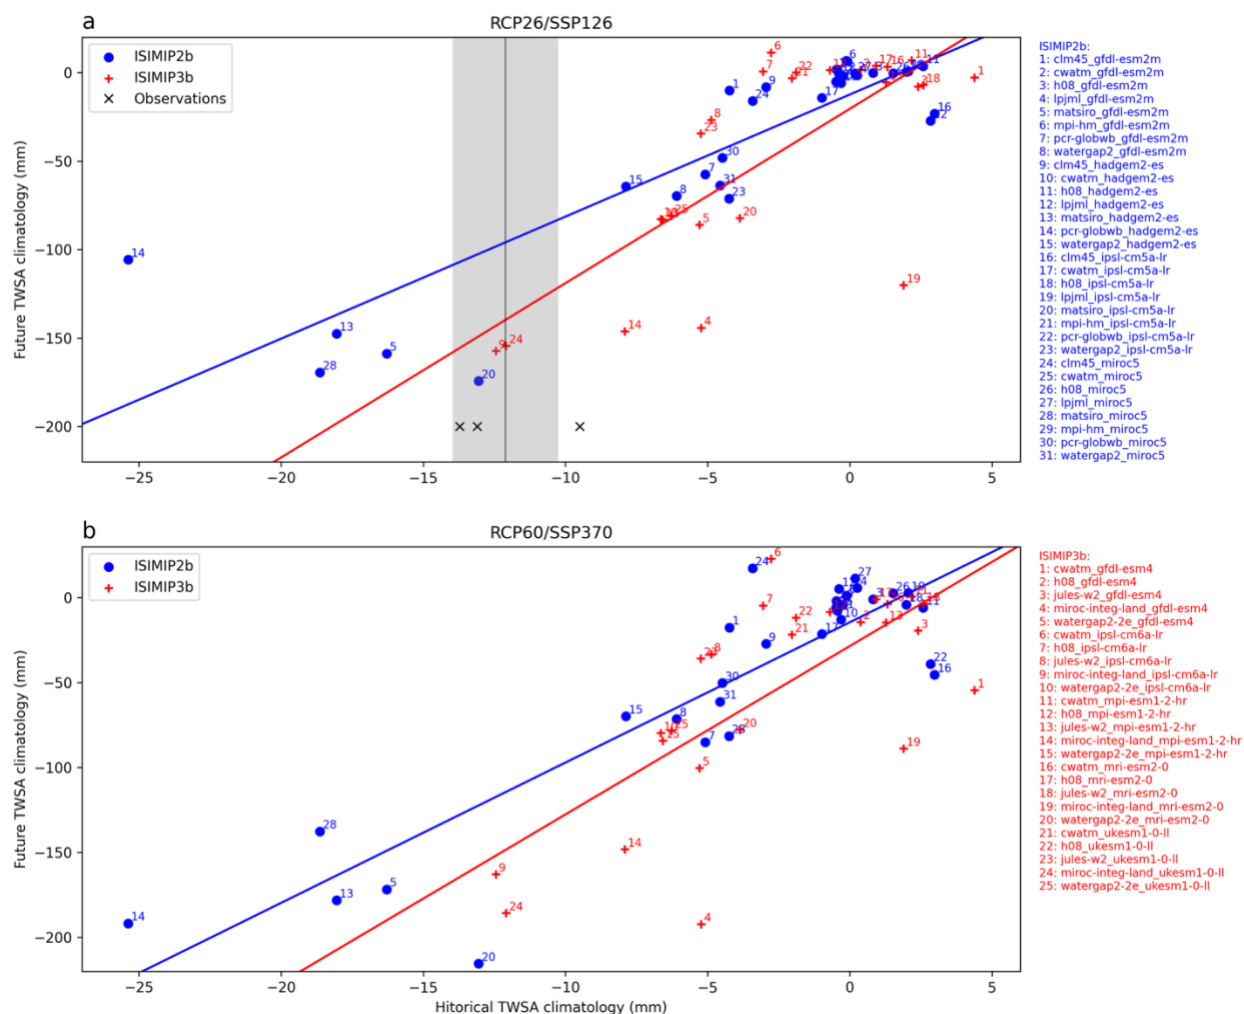

**Fig. S1 | Past-future TWSA relationships.** Inter-model relationships between historical and late century TWSA climatologies from ISIMIP2b (blue) and ISIMIP3b (red) models under the RCP2.6/SSP1-2.6 (a) and RCP6.0/SSP3-7.0 (b) scenarios. Dots and crosses represent global averages of TWSAs from ensemble members. Blue and red lines denote the linear regression, black vertical lines indicate the average of three mascon solutions (black cross), and grey shading represents the standard deviation. Ensemble member names are annotated.

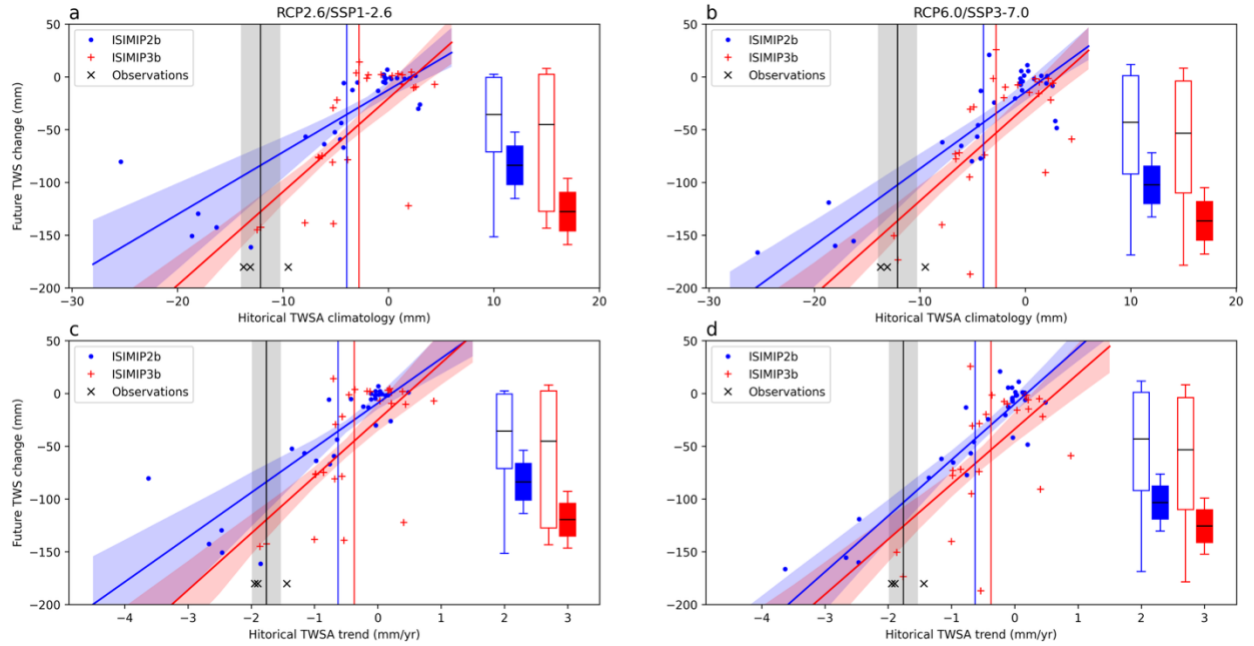

**Fig. S2 | Different emergent constraints on future changes in TWS.** **a,b,** Upper panels depict inter-model relationships between historical climatologies and late century TWS changes from ISIMIP2b (blue) and ISIMIP3b (red) models under the RCP2.6/SSP1-2.6 and RCP6.0/SSP3-7.0 scenarios. **c,d,** Lower panels illustrate inter-model relationships between historical TWSA trends and late century TWS changes for the same scenarios. Dots and crosses represent global averages of TWSAs from ensemble members. Blue and red lines represent linear regression fits, with 90% confidence intervals estimated through bootstrapping. Blue and red vertical lines mark the ensemble mean. Black vertical lines indicate the average of three mascon solutions (black cross), and grey shading represents the standard deviation. Box plots indicate the mean (black line), 66% (box), and 90% (whisker) confidence intervals of future TWS changes before (empty box) and after (filled box) applying observational constraints.

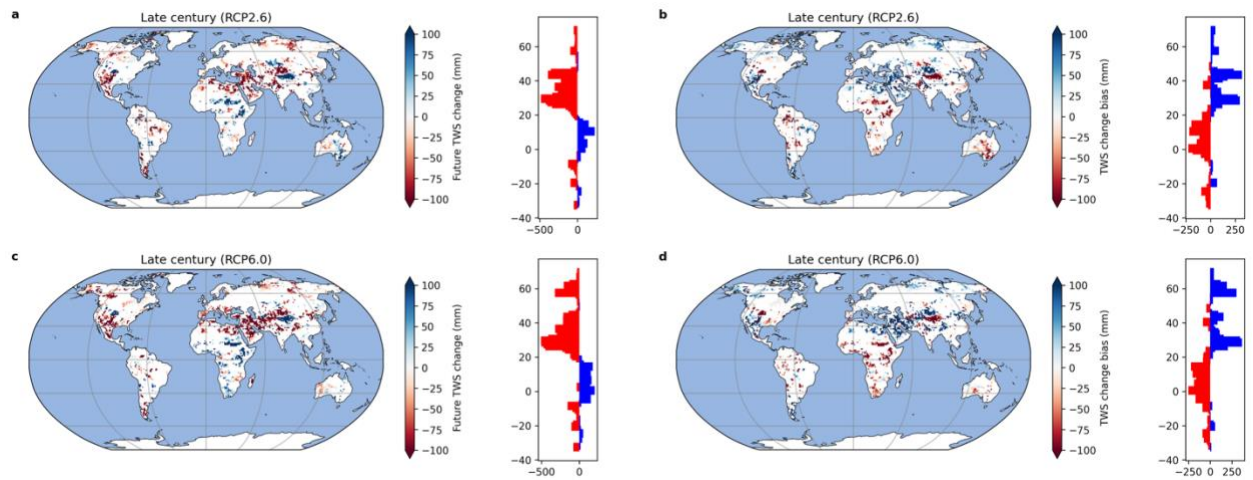

**Fig. S3 | EC-calibrated changes in TWS from the ISIMIP2b models at the end of the century.** **a,c**, Late century (2080–2099) EC-corrected TWS changes under the RCP2.6 and RCP6.0 scenarios, shown relative to historical (2004–2023) climatologies. **b,d**, Biases in projected late century TWS changes (raw model outputs minus EC-corrected values). Only regions with statistically significant positive EC correlations ( $R > 0$  and  $p < 0.05$ ) are shown. The histograms on the right represent zonally averaged values, with data shown only for latitudes between 70°N and 35°S due to sparse coverage outside this range.

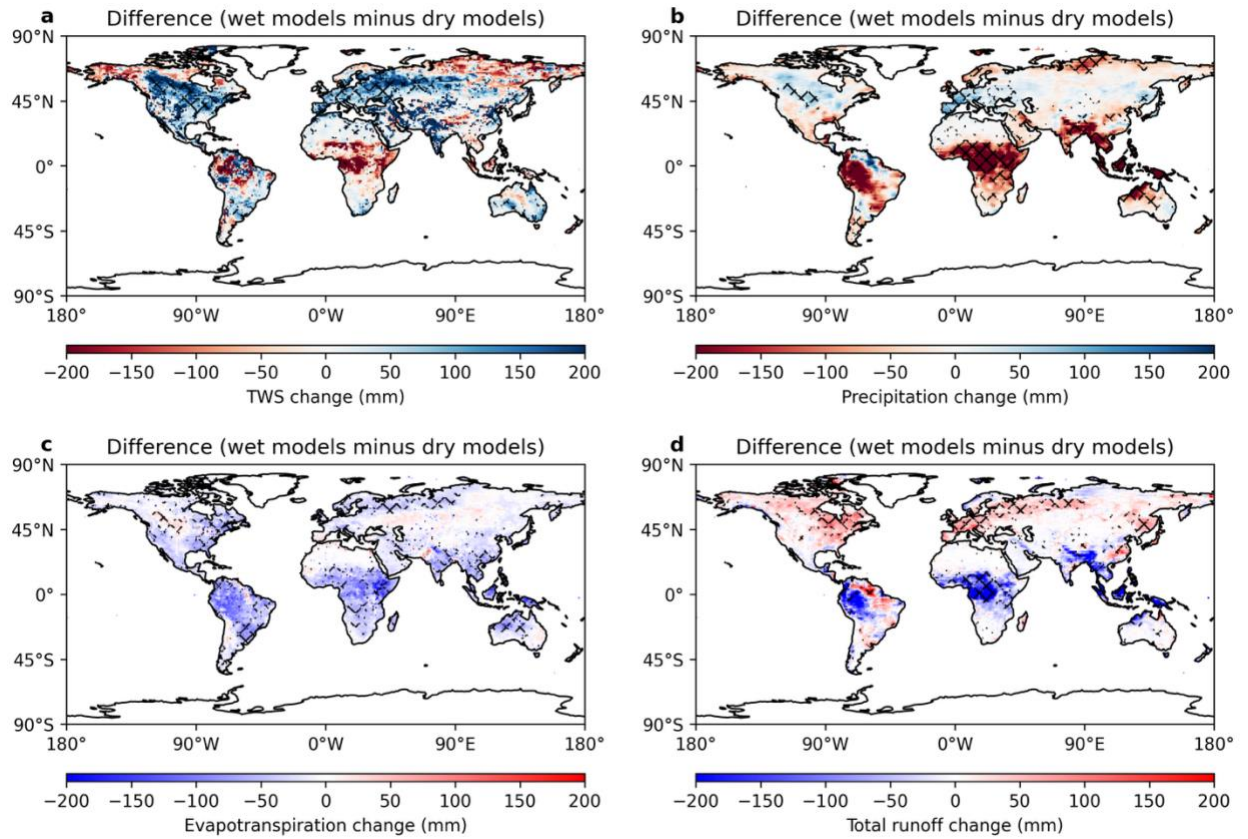

**Fig. S4 | Differences in future changes between the wettest and driest models.** Differences (the wettest minus the driest models) in late century (2080–2099) changes for TWS (**a**), precipitation (**b**), evapotranspiration (**c**), and total runoff (**d**) under the SSP3-7.0 scenario. Statistically significant differences at the 5% level, as determined by Welch’s *t*-test, are indicated by black hatches. A permutation test with 100 random permutations was conducted to estimate the *p*-values.

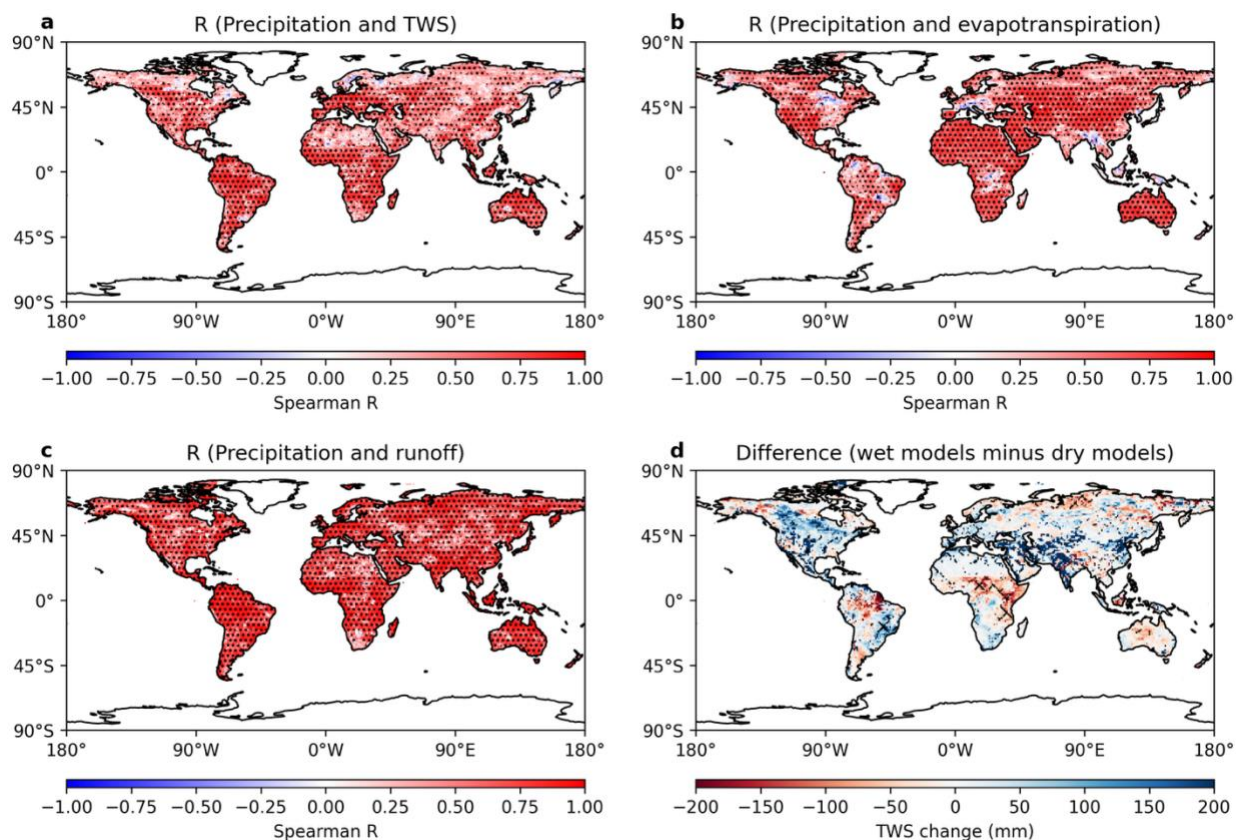

**Fig. S5 | Spatial patterns in future changes.** Same as Fig. 4 but under the SSP1-2.6 scenario.



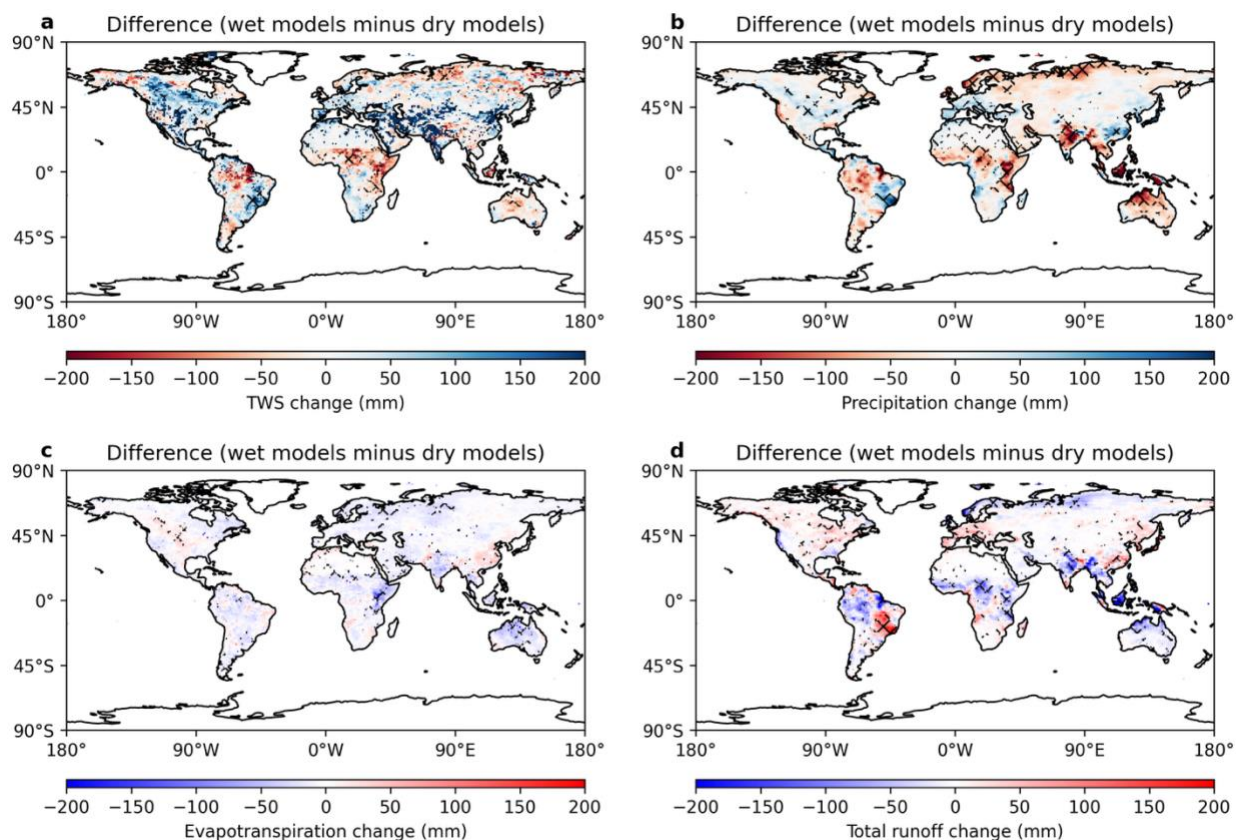

**Fig. S6 | Differences in future changes between the wettest and driest models.** Same as Fig. S4 but under the SSP1-2.6 scenario.

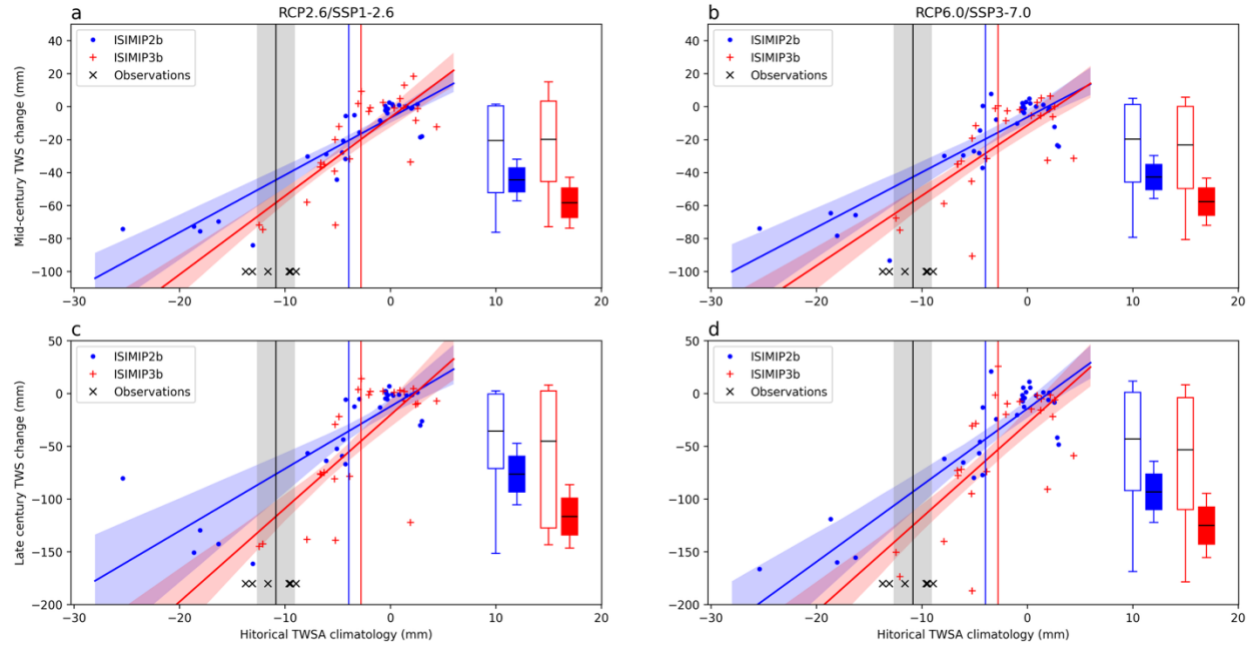

**Fig. S7 | Emergent constraints on future changes in TWS.** Same as Fig. 1, but replacing the mascon solutions with 7 GRACE-derived TWSA products. These include three mascon solutions (i.e., JPL RL06.3M v04, CSR RL0603M, and GSFC RL06 v1.0) and four spherical-harmonic solutions (i.e., JPL RL06, CSR RL06, GFZ RL06, and COST-G RL01), thereby illustrating the robustness of our results across diverse GRACE processing approaches.



**Table S1 | Description of ISIMIP3b settings.** All outputs are provided at a monthly temporal resolution and on a  $0.5^\circ \times 0.5^\circ$  global grid. Specific storage compartments include canopy water storage (canopystor), groundwater storage (groundwstor), lake storage (lakestor), wetland storage (wetlandstor), reservoir storage (reservoirstor), soil moisture (soilmoist), snow water equivalent (swe), and river storage (riverstor). Ensemble members are classified into the driest (D) and wettest (W) categories based on their historical climatology of global mean TWSAs (see Methods).

| <b>Model</b>     | <b>Meteorological forcing</b>                                                   | <b>Radiative forcing scenario</b> | <b>Socioeconomic scenario</b>                             | <b>Water storage compartments considered(Telteu et al., 2021)</b>                        |
|------------------|---------------------------------------------------------------------------------|-----------------------------------|-----------------------------------------------------------|------------------------------------------------------------------------------------------|
| CWatM            | GFDL-ESM4 (W), IPSL-CM6A-LR, MPI-ESM1-2-HR (W), MRI-ESM2-0 (W), UKESM1-0-LL     | HIST, SSP1-2.6, SSP3-7.0          | histsoc (HIST), 2015soc-from-histsoc (SSP1-2.6, SSP3-7.0) | groundwstor, soilmoist, lakestor, reservoirstor, riverstor, swe, canopystor              |
| H08              | GFDL-ESM4, IPSL-CM6A-LR, MPI-ESM1-2-HR, MRI-ESM2-0, UKESM1-0-LL                 | HIST, SSP1-2.6, SSP3-7.0          | histsoc (HIST), 2015soc (SSP1-2.6, SSP3-7.0)              | swe, soilmoist, groundwstor, reservoirstor, riverstor                                    |
| JULES-W2         | GFDL-ESM4 (W), IPSL-CM6A-LR, MPI-ESM1-2-HR, MRI-ESM2-0 (W), UKESM1-0-LL         | HIST, SSP1-2.6, SSP3-7.0          | histsoc (HIST), 2015soc-from-histsoc (SSP1-2.6, SSP3-7.0) | canopystor, swe, soilmoist                                                               |
| MIROC-INTEG-LAND | GFDL-ESM4, IPSL-CM6A-LR (D), MPI-ESM1-2-HR (D), MRI-ESM2-0 (W), UKESM1-0-LL (D) | HIST, SSP1-2.6, SSP3-7.0          | histsoc (HIST), 2015soc-from-histsoc (SSP1-2.6, SSP3-7.0) | soilmoist, canopystor, swe, riverstor, reservoirstor                                     |
| WaterGAP2-2e     | GFDL-ESM4, IPSL-CM6A-LR (D), MPI-ESM1-2-HR (D), MRI-ESM2-0, UKESM1-0-LL (D)     | HIST, SSP1-2.6, SSP3-7.0          | histsoc (HIST), 2015soc-from-histsoc (SSP1-2.6, SSP3-7.0) | canopystor, riverstor, swe, soilmoist, groundwstor, lakestor, wetlandstor, reservoirstor |

**Table S2 | Description of ISIMIP2b settings.** All outputs are provided at a monthly temporal resolution and on a  $0.5^\circ \times 0.5^\circ$  global grid. Specific storage compartments include canopy water storage (canopystor), groundwater storage (groundwstor), lake storage (lakestor), wetland storage (wetlandstor), reservoir storage (reservoirstor), soil moisture (soilmoist), snow water equivalent (swe), and river storage (riverstor).

| <b>Model</b> | <b>Meteorological forcing</b>                | <b>Radiative forcing scenario</b> | <b>Socioeconomic scenario</b>            | <b>Water storage compartments considered</b>                                             |
|--------------|----------------------------------------------|-----------------------------------|------------------------------------------|------------------------------------------------------------------------------------------|
| CLM4.5       | GFDL-ESM2M, HadGEM2-ES, IPSL-CM5A-LR, MIROC5 | HIST, RCP2.6, RCP6.0              | 2005soc (HIST, RCP2.6, RCP6.0)           | lakestor, reservoirstor, riverstor, groundwstor, soilmoist, swe, canopystor              |
| CWatM        | GFDL-ESM2M, HadGEM2-ES, IPSL-CM5A-LR, MIROC5 | HIST, RCP2.6, RCP6.0              | histsoc (HIST), 2005soc (RCP2.6, RCP6.0) | groundwstor, soilmoist, lakestor, reservoirstor, riverstor, swe, canopystor              |
| H08          | GFDL-ESM2M, HadGEM2-ES, IPSL-CM5A-LR, MIROC5 | HIST, RCP2.6, RCP6.0              | histsoc (HIST), 2005soc (RCP2.6, RCP6.0) | swe, soilmoist, groundwstor, reservoirstor, riverstor                                    |
| LPJmL        | GFDL-ESM2M, HadGEM2-ES, IPSL-CM5A-LR, MIROC5 | HIST, RCP2.6, RCP6.0              | histsoc (HIST), 2005soc (RCP2.6, RCP6.0) | soilmoist, lakestor, riverstor, reservoirstor, swe                                       |
| MATSIRO      | GFDL-ESM2M, HadGEM2-ES, IPSL-CM5A-LR, MIROC5 | HIST, RCP2.6, RCP6.0              | histsoc (HIST), 2005soc (RCP2.6, RCP6.0) | soilmoist, canopystor, swe, riverstor, reservoirstor                                     |
| MPI-HM       | GFDL-ESM2M, IPSL-CM5A-LR, MIROC5             | HIST, RCP2.6, RCP6.0              | histsoc (HIST), 2005soc (RCP2.6, RCP6.0) | riverstor, wetlandstor, reservoirstor, groundwstor, soilmoist, canopystor                |
| PCR-GLOBWB   | GFDL-ESM2M, HadGEM2-ES, IPSL-CM5A-LR, MIROC5 | HIST, RCP2.6, RCP6.0              | histsoc (HIST), 2005soc (RCP2.6, RCP6.0) | riverstor, reservoirstor, soilmoist, swe, canopystor                                     |
| WaterGAP2    | GFDL-ESM2M, HadGEM2-ES, IPSL-CM5A-LR, MIROC5 | HIST, RCP2.6, RCP6.0              | histsoc (HIST), 2005soc (RCP2.6, RCP6.0) | canopystor, riverstor, swe, soilmoist, groundwstor, lakestor, wetlandstor, reservoirstor |
